# Supplementary material for: Adherence-dependent longitudinal effects of Nordic Walking on clinical, functional, cardiometabolic outcomes in sedentary men undergoing prostate cancer screening: a real- world prospective study
Source: Research Square preprint supplement (doi:10.21203/rs.3.rs-7800010/v1), 2026-01-12
Supplement: Supplementary file 1 [file 25b4e7fb3fed4805aafbb98a.docx]

**Supplementary Table 1**. List of variables analyzed (excluding circulating proteins):

MVPA, Total MET, 6WT (walked meters), 6WT (number of laps), Sedentary behavior, O2 saturation, Body roundness index (BRI), Waist to Height Ratio, Waist to Hip Ratio, RPE_6WT, Weight, Sit-to-Stand test, Hip Circumference, Physical Score, BMI, Systolic Pressure, Diastolic Pressure, Timed-Up-and-Go-Test, Waist Circumference, Conicity Index, Heart Rate, Mental Score, Hand Grip sx-dx, and PSA.
