# Supplementary material for: Adherence-dependent longitudinal effects of Nordic Walking on clinical, functional, cardiometabolic outcomes in sedentary men undergoing prostate cancer screening: a real- world prospective study
Source: Research Square preprint supplement (doi:10.21203/rs.3.rs-7800010/v1), 2026-01-12
Supplement: Supplementary file 1 [file 37567f14d20d43b6c616341e.pdf]

## Brief Questionnaire – DP3 Study

Patient ID:

Date of completion:

Age:

### Anthropometric measurements

- Height (cm):
  - Weight (kg):
  - BMI (Do not fill in)
- 

### Medical history

- Have you previously had a blood test for PSA measurement? ☐ YES ☐ NO
  - Have you ever had prostatitis or urinary tract infections? ☐ YES ☐ NO
    - If YES, did you undergo specific treatments? Which ones?
  - Are you diabetic? ☐ YES ☐ NO
  - Do you suffer from high blood pressure (hypertension)? ☐ YES ☐ NO
  - Do you have heart disease? ☐ YES ☐ NO
  - Do you take medications regularly? ☐ YES ☐ NO
    - If YES, which ones? .....
  - Have you ever been diagnosed with cancer? ☐ YES ☐ NO
    - If YES, which type? .....
  - Other illnesses: .....
  - Do you have a family history of cancer? ☐ YES ☐ NO
    - If YES, who has been diagnosed with cancer and what type of cancer?  
.....
- 

### Lifestyle

Do you engage in physical activity?

☐ Sedentary ☐ Moderate (1–2 times per week) ☐ High (3 or more times per week)

Type of work:

☐ Sedentary ☐ Standing ☐ Manual labor ☐ Not employed

### Risk factors

Smoking: ☐ YES ☐ NO ☐ FORMER SMOKER (stopped since: .....)

- If YES, how many cigarettes per day? .....

Alcohol consumption: ☐ YES ☐ NO ☐ OCCASIONALLY

- If YES, what type? ☐ Wine ☐ Beer ☐ Spirits
- When? ☐ Only with meals ☐ Also between meals
- How often? ☐ Every day ☐ 1–2 times per week ☐ 3–4 times per week

Do you usually drink coffee? ☐ YES ☐ NO

- If YES, how many cups per day? .....

## Eating habits

How often do you consume the following foods per week?

[illegible]
