# Supplementary material for: Adherence-dependent longitudinal effects of Nordic Walking on clinical, functional, cardiometabolic outcomes in sedentary men undergoing prostate cancer screening: a real- world prospective study
Source: Research Square preprint supplement (doi:10.21203/rs.3.rs-7800010/v1), 2026-01-12
Supplement: Supplementary file 2 [file 2b13cca921c51e98a37bfda0.docx]

**Supplementary Table 2**. Linear regression analysis results, with adjustment for age, BMI, age x BMI and baseline variable levels.

| Variabile | *Estimate* | *P-value* | *Std.Error* | *T_value* |
| --- | --- | --- | --- | --- |
| MVPA | 0.003061 | 2.87E-09 | 0.000433 | 7.072118 |
| Total MET | 0.000155 | 3.99E-09 | 2.22E-05 | 6.985356 |
| 6WT (walked meters) | 0.00315 | 0.003787 | 0.001043 | 3.021539 |
| 6WT (number of laps) | 0.09783 | 0.00380 | 0.032397 | 3.0200 |
| Sedentary behavior | -0.00185 | 0.010215 | 0.000697 | -2.66011 |
| O2 saturation | 0.115521 | 0.052928 | 0.058179 | 1.985607 |
| Body roundness index (BRI) | -0.23842 | 0.066 | 0.12715 | -1.875 |
| Waist to Height Ratio | -5.41172 | 0.0674 | 2.901329 | -1.865 |
| Waist to Hip Ratio | -3.39697 | 0.075102 | 1.873075 | -1.81358 |
| RPE in 6WT | -0.12299 | 0.094656 | 0.072342 | -1.70012 |
| Weight | -0.03252 | 0.098025 | 0.019329 | -1.68258 |
