# Supplementary material for: Adherence-dependent longitudinal effects of Nordic Walking on clinical, functional, cardiometabolic outcomes in sedentary men undergoing prostate cancer screening: a real- world prospective study
Source: Research Square preprint supplement (doi:10.21203/rs.3.rs-7800010/v1), 2026-01-12
Supplement: Supplementary file 3 [file 69592776d82c0fc915fd2b66.docx]

**Supplementary Table 3**. Results of Friedman test applied to the 3 time points for the listed variables.

| Friedman test | p-value |
| --- | --- |
| Total MET | 1.10E-05 |
| 6WT (n. laps) | 3.56E-05 |
| MVPA | 3.79E-05 |
| 6WT (walked meters) | 0.000117 |
| Sit-to-Stand test | 0.000762 |
| Hip Circumference | 0.001153 |
| Physical Score | 0.009359 |
| Weight | 0.01278 |
| BMI | 0.01278 |
| Systolic Pressure | 0.02499 |
| Timed-Up-and-Go-Test | 0.03444 |
| Sedentary Behavior | 0.056 |
| Waist Circumference | 0.07814 |
| BRI | 0.07814 |
| Waist to height ratio | 0.07814 |
